# Supplementary material for: TANGO: a placebo-controlled randomized phase 2 study of efficacy and safety of the anti-tau monoclonal antibody gosuranemab in early Alzheimer’s disease
Source: Springer Nature journal article supplement (doi:10.1038/s43587-023-00523-w), 2023-11-27
Supplement: 43587_2023_523_MOESM3_ESM.pdf [file 43587_2023_523_MOESM3_ESM.pdf]

**Supplementary Table 1. ADAS-Cog13 results in the placebo-controlled and LTE periods.**

|                      |                                                              | Placebo<br>(High Dose<br>Late Start after<br>week 78)<br>(N=214) | Low Dose<br>(N=116) | Intermediate<br>Dose<br>(N=106) | High Dose<br>(N=214) |
|----------------------|--------------------------------------------------------------|------------------------------------------------------------------|---------------------|---------------------------------|----------------------|
| Week<br>24           | n                                                            | 204                                                              | 109                 | 102                             | 207                  |
|                      | Adjusted mean change<br>from baseline                        | 0.77                                                             | 1.60                | 0.83                            | 1.16                 |
|                      | 95% CI                                                       | (-0.037, 1.577)                                                  | (0.597, 2.594)      | (-0.193, 1.848)                 | (0.361, 1.951)       |
|                      | p-value (compared with<br>placebo/ high dose late-<br>start) | N/A                                                              | 0.1463              | 0.9212                          | 0.4146               |
| Week<br>52           | n                                                            | 174                                                              | 98                  | 95                              | 179                  |
|                      | Adjusted mean change<br>from baseline                        | 2.23                                                             | 3.28                | 3.84                            | 3.21                 |
|                      | 95% CI                                                       | (1.221, 3.236)                                                   | (2.006, 4.555)      | (2.545, 5.142)                  | (2.217, 4.207)       |
|                      | p-value (compared with<br>placebo/ high dose late-<br>start) | N/A                                                              | 0.1673              | 0.0371                          | 0.1252               |
| Week<br>78           | n                                                            | 170                                                              | 96                  | 90                              | 173                  |
|                      | Adjusted mean change<br>from baseline                        | 5.83                                                             | 7.54                | 7.58                            | 7.50                 |
|                      | 95% CI                                                       | (4.602, 7.054)                                                   | (5.963, 9.113)      | (5.956, 9.195)                  | (6.292, 8.717)       |
|                      | p-value (compared with<br>placebo/ high dose late-<br>start) | N/A                                                              | 0.0765              | 0.0760                          | 0.0397               |
| Week<br>104<br>(LTE) | n                                                            | 126                                                              | 75                  | 72                              | 132                  |
|                      | Adjusted mean change<br>from baseline                        | 7.98                                                             | 9.55                | 8.78                            | 9.78                 |
|                      | 95% CI                                                       | (6.426, 9.533)                                                   | (7.542, 11.553)     | (6.723, 10.837)                 | (8.247, 11.307)      |
|                      | p-value (compared with<br>placebo/ high dose late-<br>start) | N/A                                                              | 0.2105              | 0.5296                          | 0.0907               |

Analysis was performed using mixed model repeated measures with data from the placebo-controlled period and LTE period. Analyses were two-sided at 5% significance level. No adjustments were made for multiple comparisons.
